# Supplementary material for: Antimicrobial Activity of Chitosan Oligosaccharides with Special Attention to Antiparasitic Potential
Source: MDPI journal article supplement (doi:10.3390/md19020110), 2021-02-12

**Figure S1:** Chromatogram HPLC-MS/MS of COS samples between 1.5 to 4 min run. Orange: Chitosan; dark green: COSG1; green: COSG2; light green: COSG3.

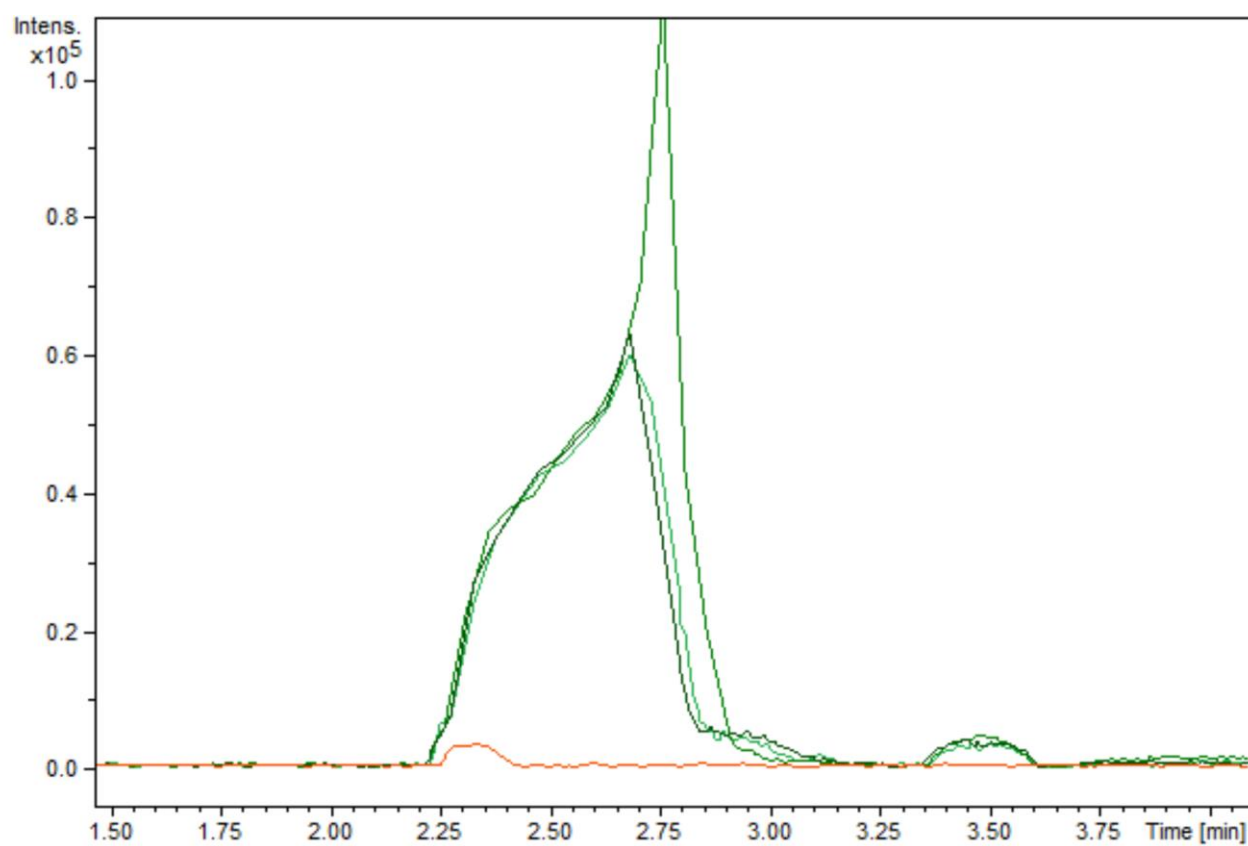

**Figure S2:** A. HPLC-MS/MS chromatogram from 19.2 to 20.1 min of the fractions COSG1 (dark blue), COSG2 (Blue), and COSG3 (light blue); B. MS spectrum to the peak in 19.4 min from COSG3; C. MS spectrum to the peak in 19.6 min from COSG3; D. MS spectrum to the peak in 19.8 min from COSG3.

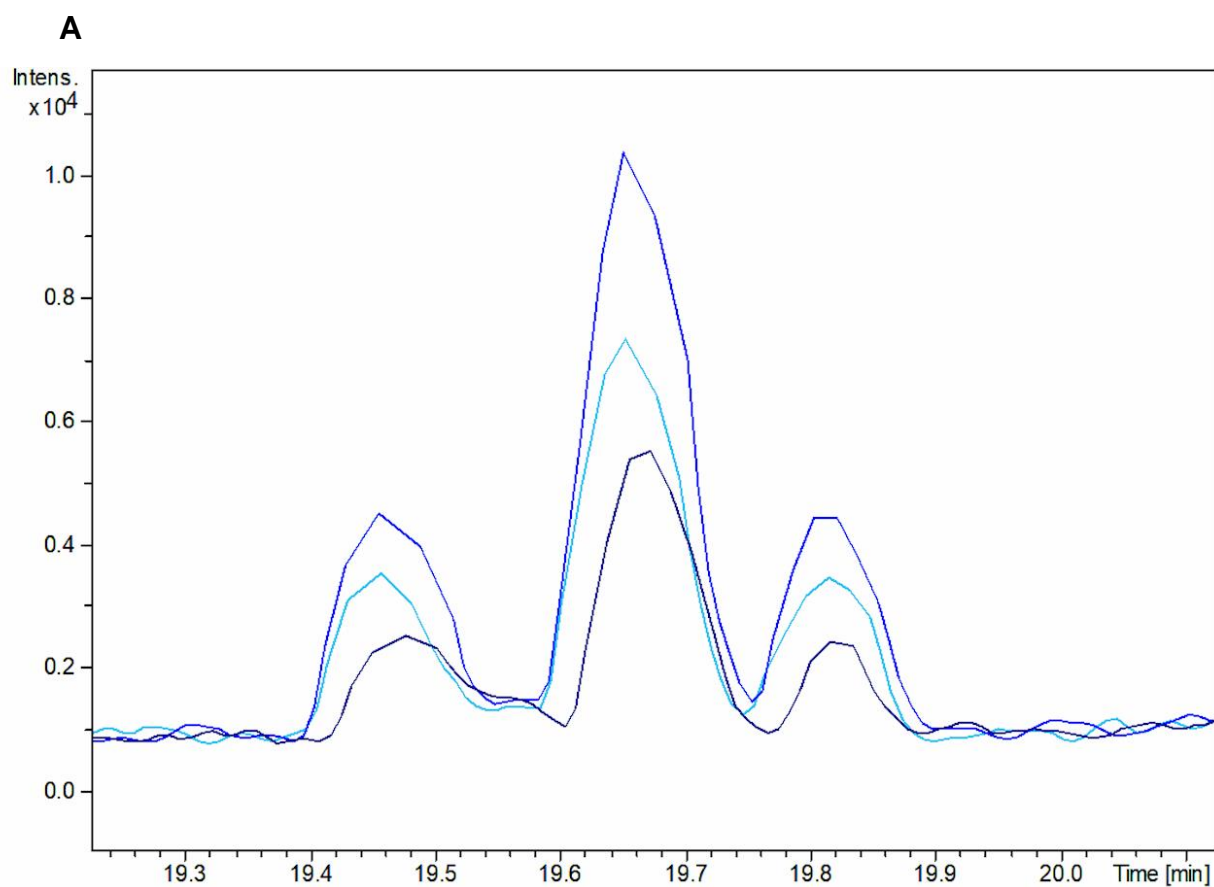

**B**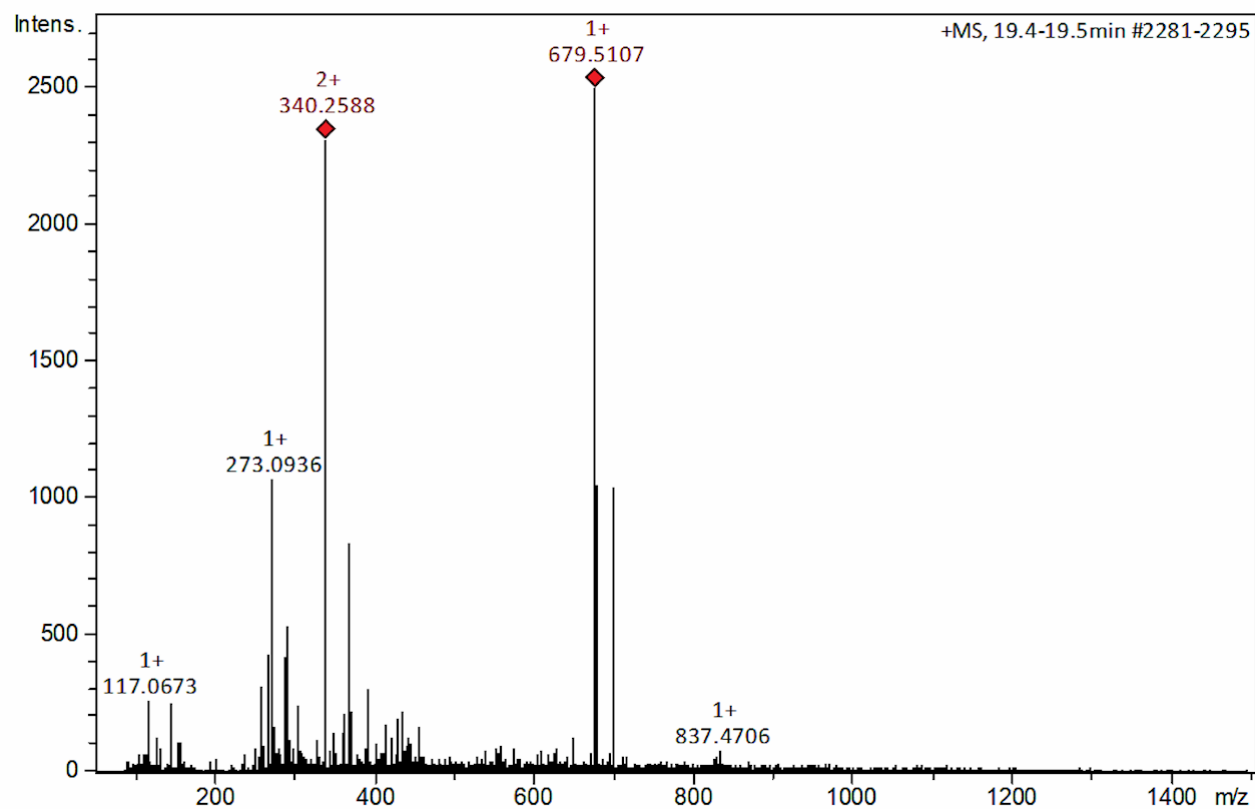**C**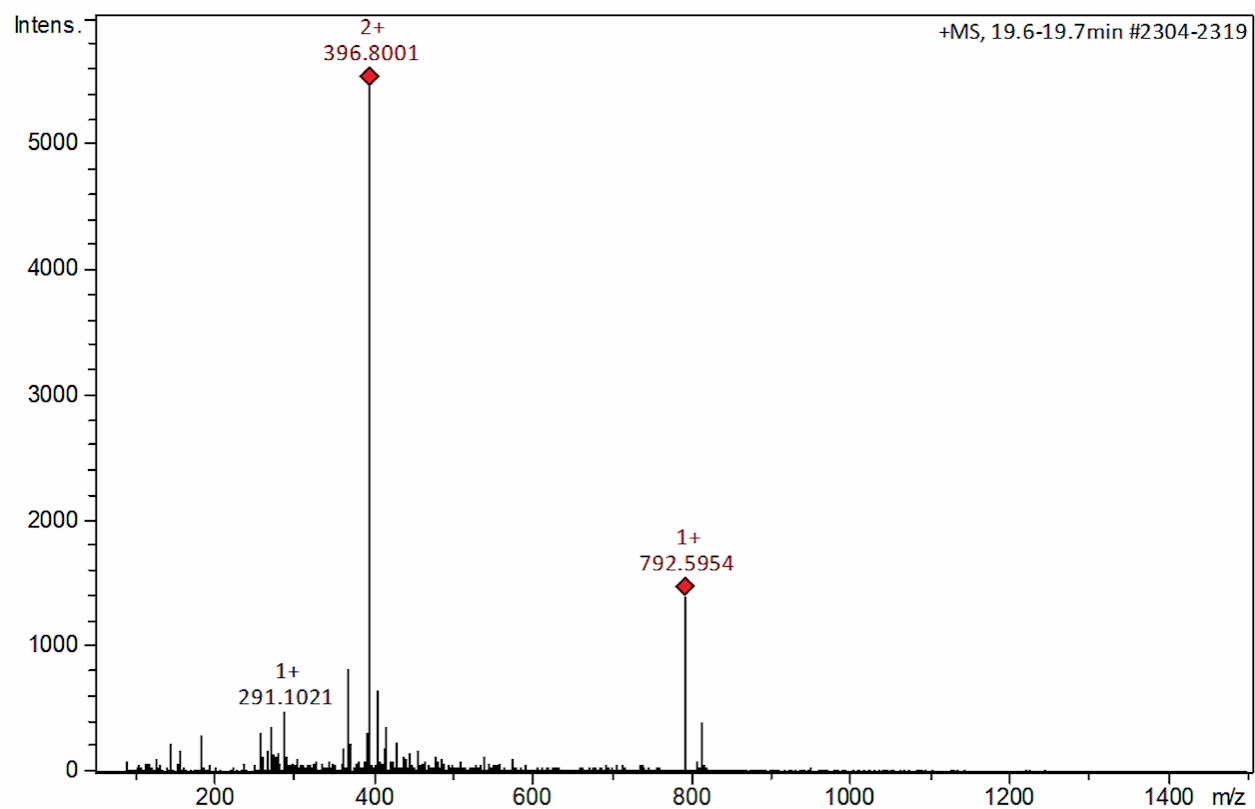

D

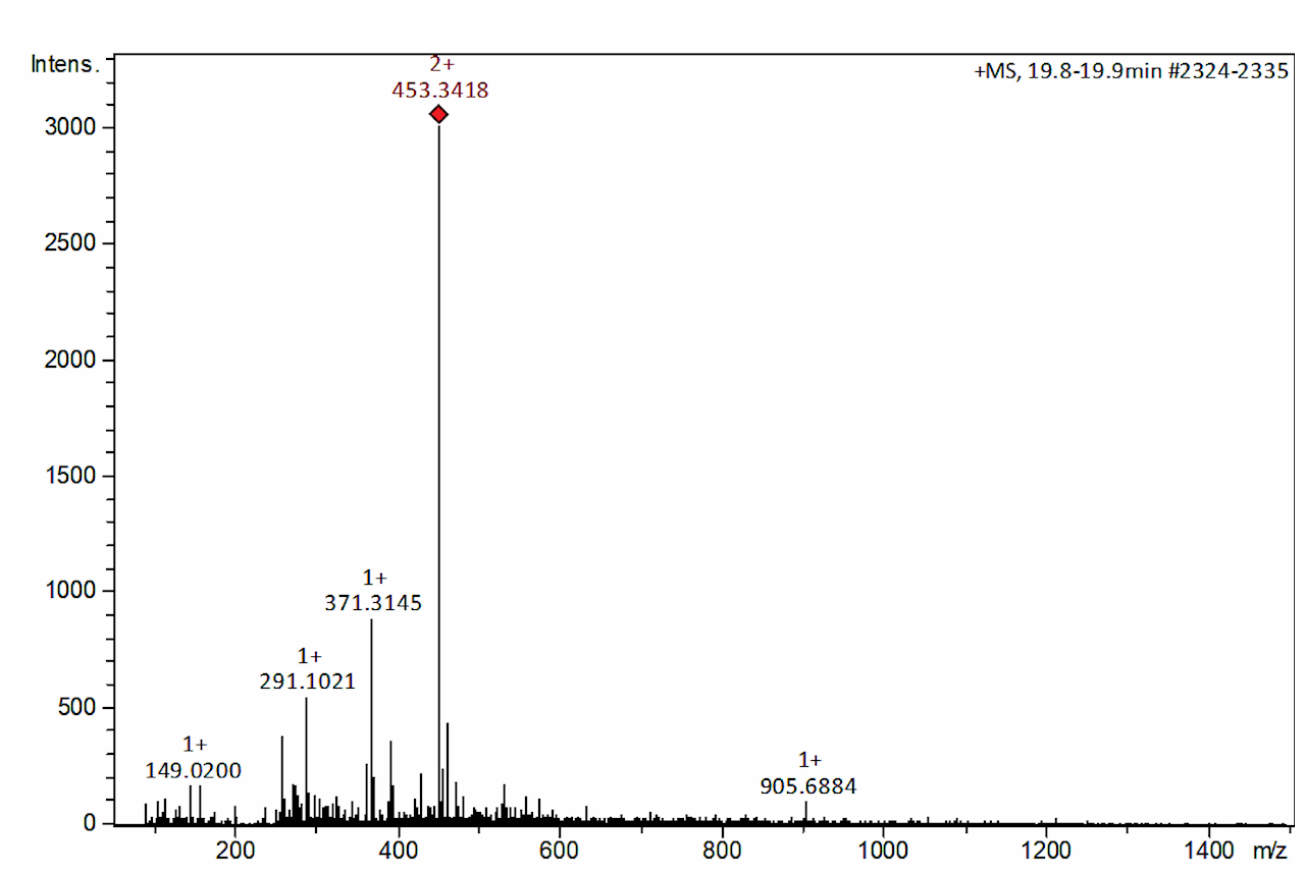

Supplement: s1 [file s1]
